# Supplementary material for: Pbx4 limits heart size and fosters arch artery formation by partitioning second heart field progenitors and restricting proliferation
Source: Oxford University Press journal article supplement (doi:10.1242/dev.185652), 2020-02-24
Supplement: dev185652supp.pdf [file dev185652supp.pdf]

## Supplementary Information

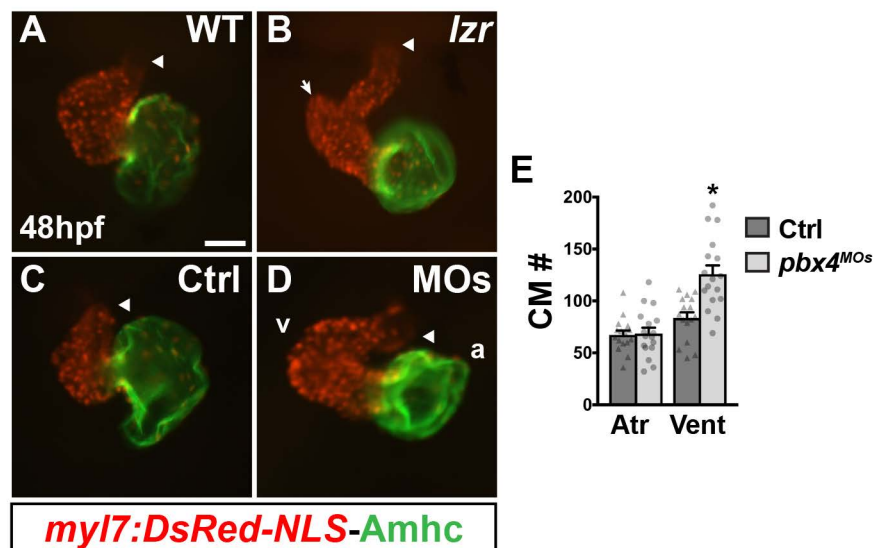

**Fig. S1. Pbx4 depletion results in a specific increase in ventricular CMs equivalent to *lzf* mutants.** (A,B) Hearts of WT and *lzf* mutant *myl7:DsRed2-NLS* embryos at 48 hpf. (C,D) Hearts of Control (Ctrl) and Pbx4-depleted *myl7:DsRed2-NLS* embryos at 48 hpf. IHC for DsRed2-NLS (CMs - red) and Amhc (atria - green). Images are frontal views. White arrow in B denotes ventricular protrusion. White arrowheads indicate the arterial pole of the hearts. Scale bar - 50  $\mu$ m. (E) Number of CMs in hearts of WT and *lzf* mutant *myl7:DsRed2-NLS* embryos at 48 hpf. WT n=16, Pbx4-depleted n=17.

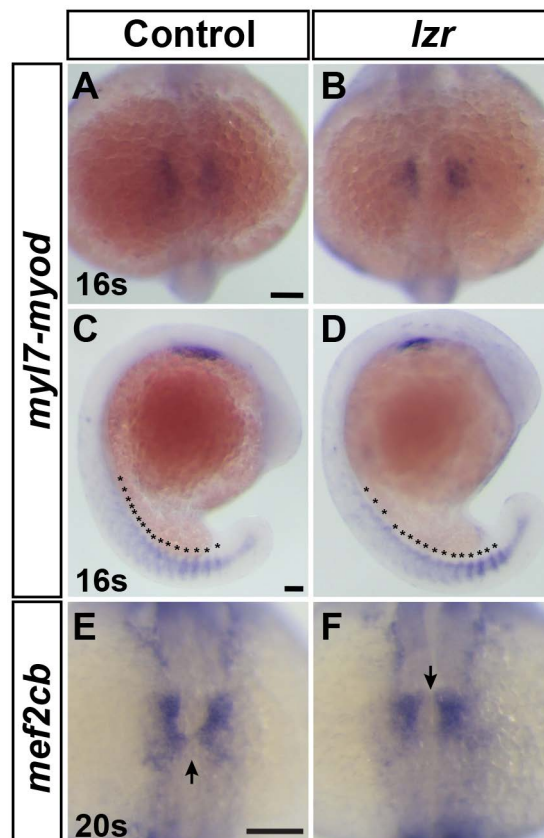

**Fig. S2. Early CM differentiation is not affected in *lzf* mutants. (A-D) ISH for *myl7* and *myod* at 16s.** Views in A and B are dorsal with anterior up and show *myl7*. Views in C and D are lateral with dorsal right of same embryos in A and B. Asterisks indicate somites. WT n=52, *lzf* n=4. (E,F) ISH for *mef2cb* at the 20s stage. Views in E and F are dorsal with anterior up. Arrows indicated sites of fusion of the cardiac cells forming the cone. WT n=2, *lzf* n=2. Scale bars - 100  $\mu$ m.

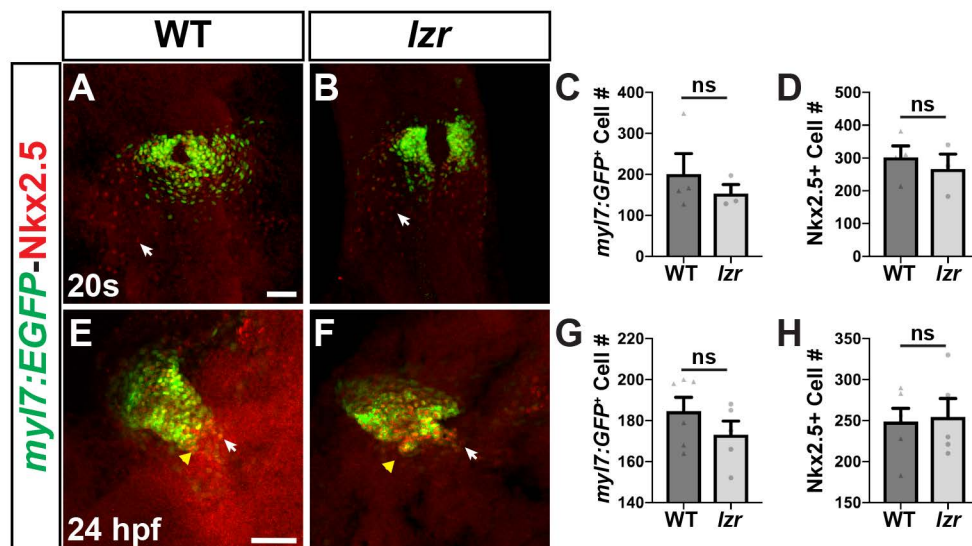

**Fig. S3. Differentiating CMs and CM progenitors are not affected in *lxl* mutants.** (A,B,E,F) IHC for *myl7:EGFP* (green) and *Nkx2.5* (red) at the 20s stage and 24 hpf. Views are dorsal with anterior up. White arrows indicate *Nkx2.5*<sup>+</sup> nuclei. Yellow arrows in E and F indicate arterial pole of the heart. Scale bars - 50 μm. (C,G) Number of *myl7:EGFP*<sup>+</sup> CMs at 20s (WT n= 4, *lxl* n=3) and 24 hpf (WT n=5, *lxl* n=4). (D,H) Number of *Nkx2.5*<sup>+</sup> cells at 20s (WT n=4, *lxl* n=3) and 24 hpf (WT n=5, *lxl* n=4).

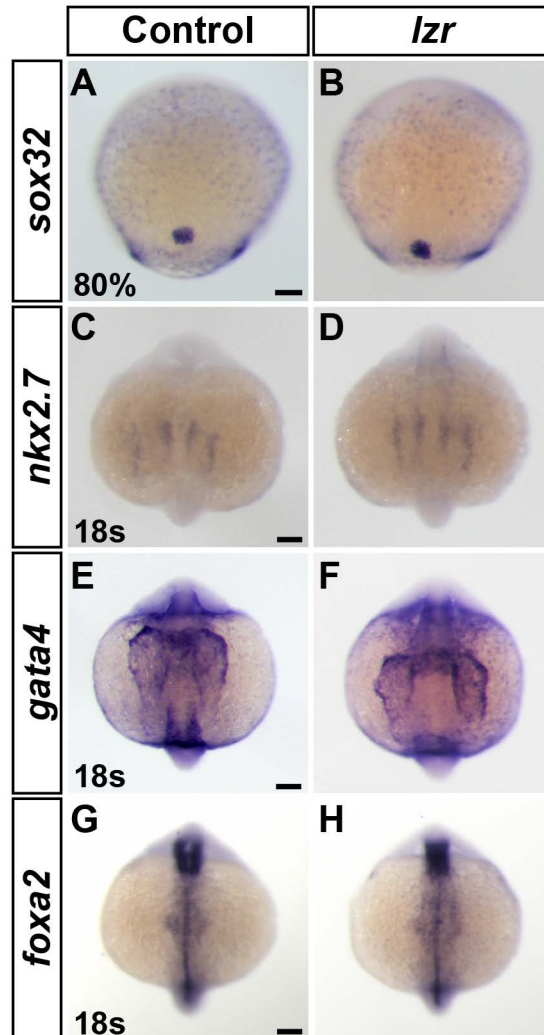

**Fig. S4. Endodermal development is overtly normal in *lzf* mutants.** (A,B) ISH for the endodermal marker *sox32* at 80% epiboly. Views are dorsal with the animal pole up. WT n=14, *lzf* n=2. (C,D) ISH for the cardiac (medial) and pharyngeal endoderm marker (lateral) *nkx2.7* at 18 hpf. WT n=32, *lzf* n=8. (E,F) ISH for the cardiac (medial) and endoderm marker *gata4* at 18 hpf. WT n=14, *lzf* n=4. (G,H) ISH for the endodermal marker *foxa2* at 18 hpf. WT n=17, *lzf* n=9. For C-H, views are dorsal with anterior up. Scale bars - 100  $\mu$ m.

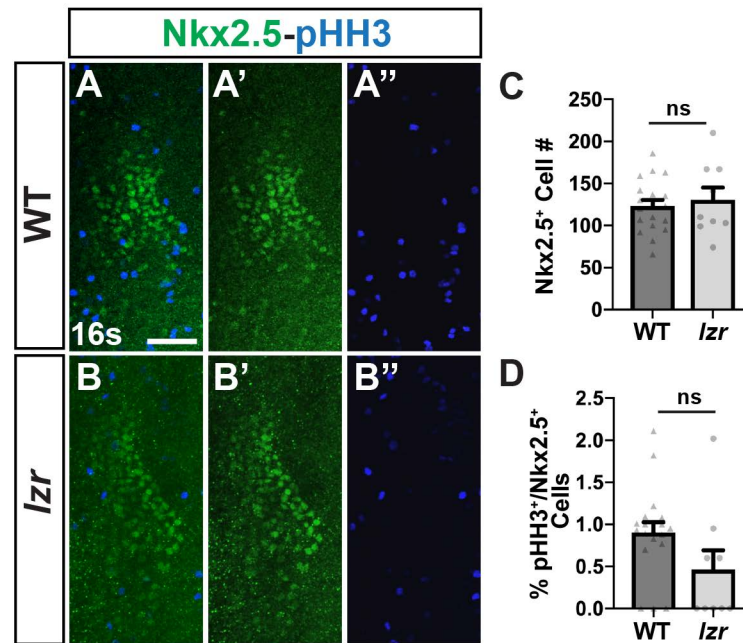

**Fig. S5. The number of Nkx2.5+ cells during somitogenesis is unaffected in *l/r* mutants.** (A-B'') IHC for Nkx2.5+ and pHH3+ cells in WT and *l/r* mutant embryos at the 16s stage. View are dorsal with anterior up of one side of the embryo. Single sides of the embryos were counted to account for uneven flat-mounting that occasionally may have abrogated cells on a single side. Scale bars - 50  $\mu$ m. (C) Number of Nkx2.5+ cells in WT and *l/r* mutants at the 16s stage. (D) Percentage of pHH3+/Nkx2.5+ cells in WT and *l/r* mutants at the 16s stage. WT n=19, *l/r* n=9.

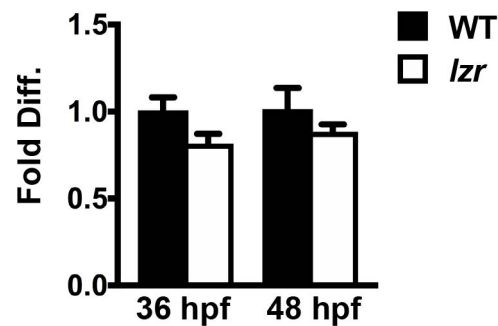

**Fig. S6. *Amhc* expression is not affected in *lzt* mutants.** RT-qPCR for *amhc* expression levels in WT and *lzt* mutants at 36 hpf and 48 hpf.

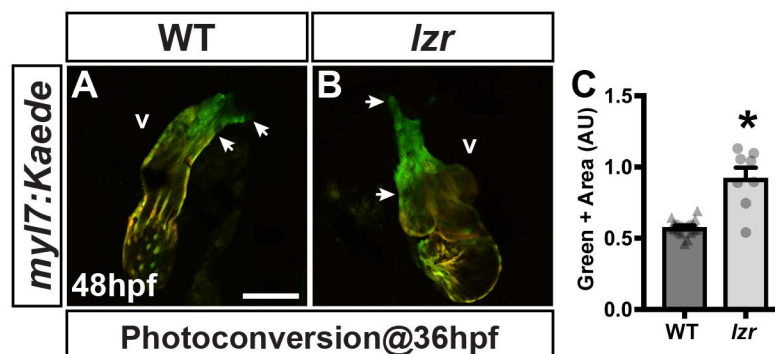

**Fig. S7. *Lzt* mutants have an increase in later-differentiating ventricular CMs.** (A,B) Confocal images of hearts from WT and *lzt* mutant *myl7:Kaede* embryos. Kaede was photoconverted at 36 hpf. Arrows indicate distance between green-only ventricular CMs and arterial pole of the ventricle. Scale bar - 100  $\mu$ m. (C) Area (A.U.) of green-only cells in images. WT n=22, *lzt* n=8 embryos.

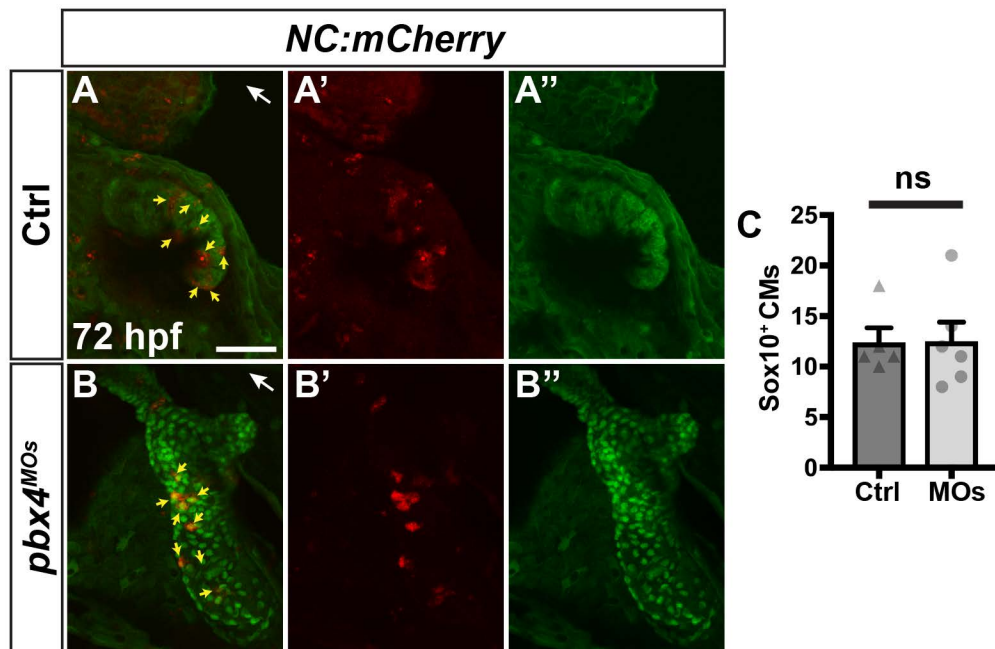

**Fig. S8. NC-derived CMs are unaffected in Pbx4-depleted embryos.** (A-B'') IHC of Control and Pbx4-depleted *NC:mCherry* embryos at 72 hpf. Yellow arrows indicated NC-derived CMs (red). Scale bar - 50 μm. (C) Number of *sox10*<sup>+</sup>-derived CMs. WT n=6, *lzf* n=5.



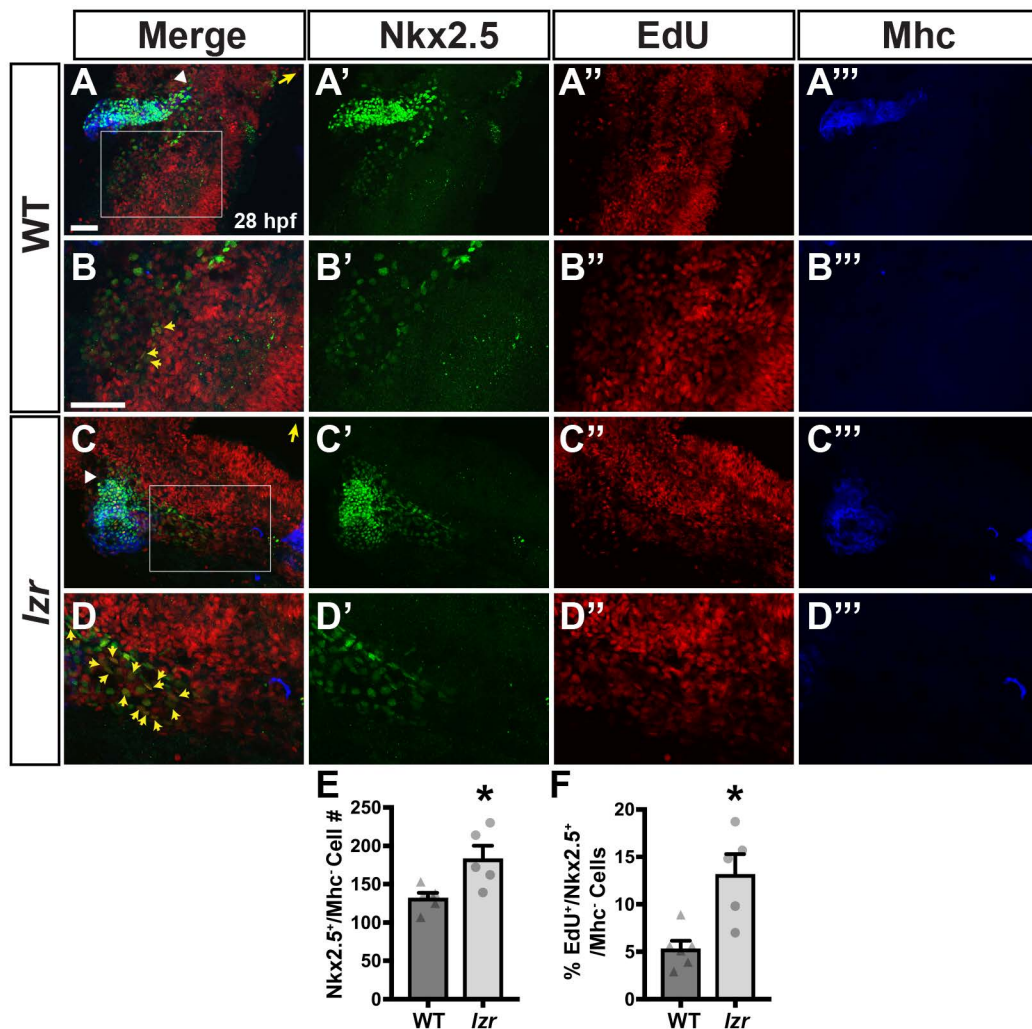

**Fig. S9. *Lzf* mutants have an increase in proliferating SHFPs.** (A-D''') IHC for EdU +, Nkx2.5+, and Mhc+ cells at 28 hpf. B and D are higher magnification images of boxes in A and C. White arrowheads in A and C indicate border of Nkx2.5+/Mhc+ and Nkx2.5+/Mhc- cells at the arterial pole of hearts. Yellow arrows in A and C indicate the direction of the arterial pole of the hearts. Yellow arrows in B and D denote Nkx2.5+/Mhc- cells co-labeled with EdU as determined using Imaris. Scale bars - 50  $\mu$ m. (E) Number of Nkx2.5+/Mhc- cells. (F) Percentage of EdU+/Nkx2.5+/Mhc- cells. For E and F, WT n=6, *lzf* n=5.



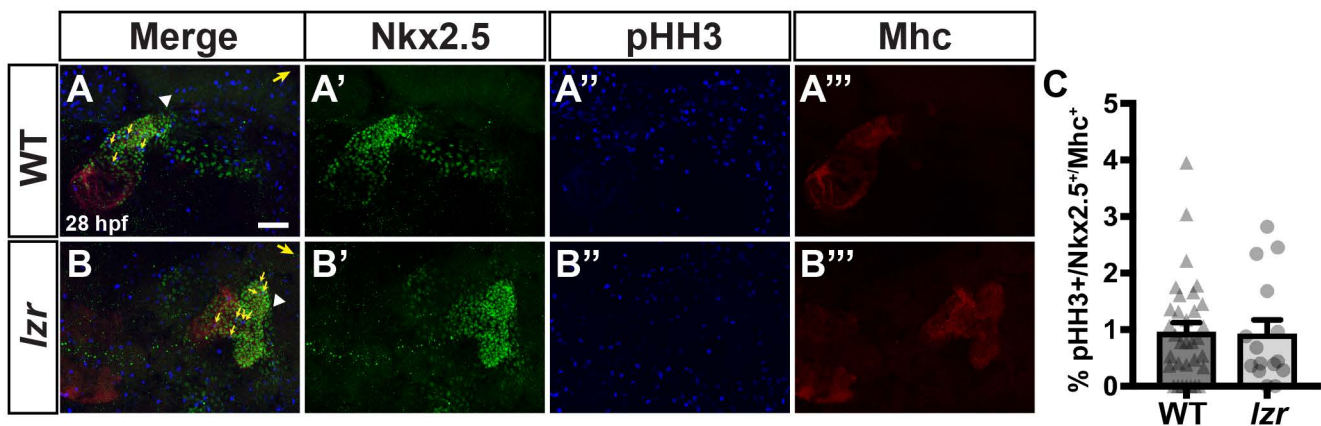

**Fig. S10. Proliferation of differentiated CMs is unaffected in *lzf* mutants.** (A-B''') IHC for Nkx2.5+, pHH3+, and Mhc+ cells in WT and *lzf* mutant embryos at 28 hpf. White arrowheads in A and B indicate border of Nkx2.5+/Mhc+ and Nkx2.5+/Mhc- cells at the arterial pole of hearts. Yellow arrows in A and B indicate the direction of the arterial pole of the hearts. Scale bars - 50  $\mu$ m. (C) Percentage of Nkx2.5+/Mhc+ cells co-stained for pHH3. Yellow arrows denotes differentiated CMs expressing pHH3. WT n=33, *lzf* n=15.

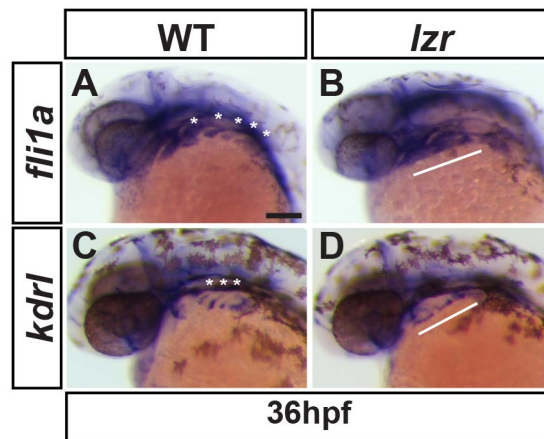

**Fig. S11. Aggregates of EC progenitors in the pPAAs are lost in *lzt* mutants.** (A-D) ISH for the EC markers *fli1a* and *kdrl* at 36 hpf in WT and *lzt* mutant embryos. Views are lateral with anterior left. Asterisks denote aggregates of EC progenitors within developing posterior arches. White line depicts *fli1a*<sup>+</sup> and *kdrl*<sup>+</sup> cells that extend to the dorsal aorta in *lzt* mutants. Scale bars - 100 μm. *fli1a* - WT n=3, *lzt* n=5; *kdrl* - WT n=10, *lzt* n=6.

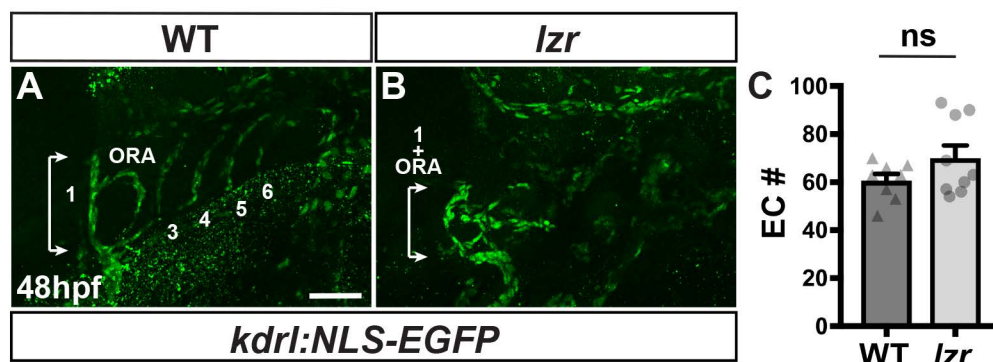

**Fig. S12. EC number within anterior PAAs of *lzt* mutants is unchanged.** (A, B) IHC of ECs in the PAAs of WT and *lzt* mutant *kdrl*:NLS-EGFP embryos. Views are lateral with anterior left. Numbers designate the PAAs. ORA – opercular artery. Brackets indicate anterior arches. Scale bars - 50 μm. (C) EC number in the 1st and 2nd arches of WT embryos and remaining anterior PAAs. WT n=8, *lzt* n=9.

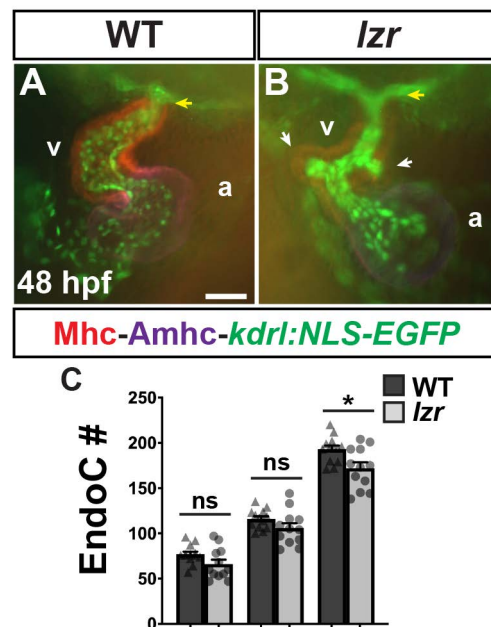

**Fig. S13. Endocardial cells are not increased in *lzt* mutants.** (A,B) IHC of hearts from WT and *lzt kdr1:NLS-EGFP* embryos at 48 hpf. Views are frontal. Mhc – red. Amhc – Purple. Yellow arrows indicate arterial pole of the heart. White arrows indicate ventricular protrusions. v – ventricle. a – atrium. Scale bar - 50  $\mu$ m. (C) Endocardial cell (EndoC) number in WT and *lzt* mutant embryos. WT n=13, *lzt* n=12.

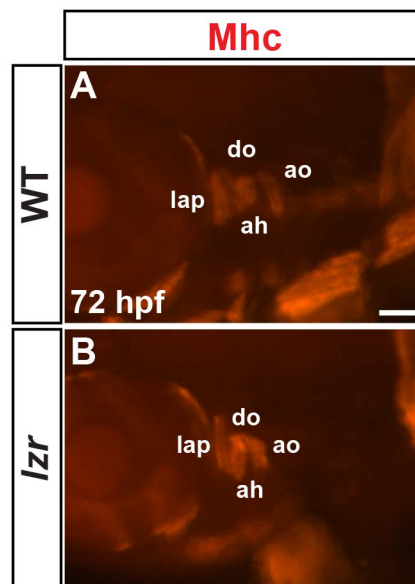

**Fig. S14. Anterior craniofacial muscles are overtly unaffected in *lzt* mutants.** (A,B) IHC for Mhc in WT and *lzt* mutants. Views are lateral with anterior left. lap - levator arcus palatini, do - dilator opercula, ah - adductor hyoideus, ao - adductor operculi. WT n=35 and *lzt* n=12 embryos that were examined. Scale bar - 50  $\mu$ m.

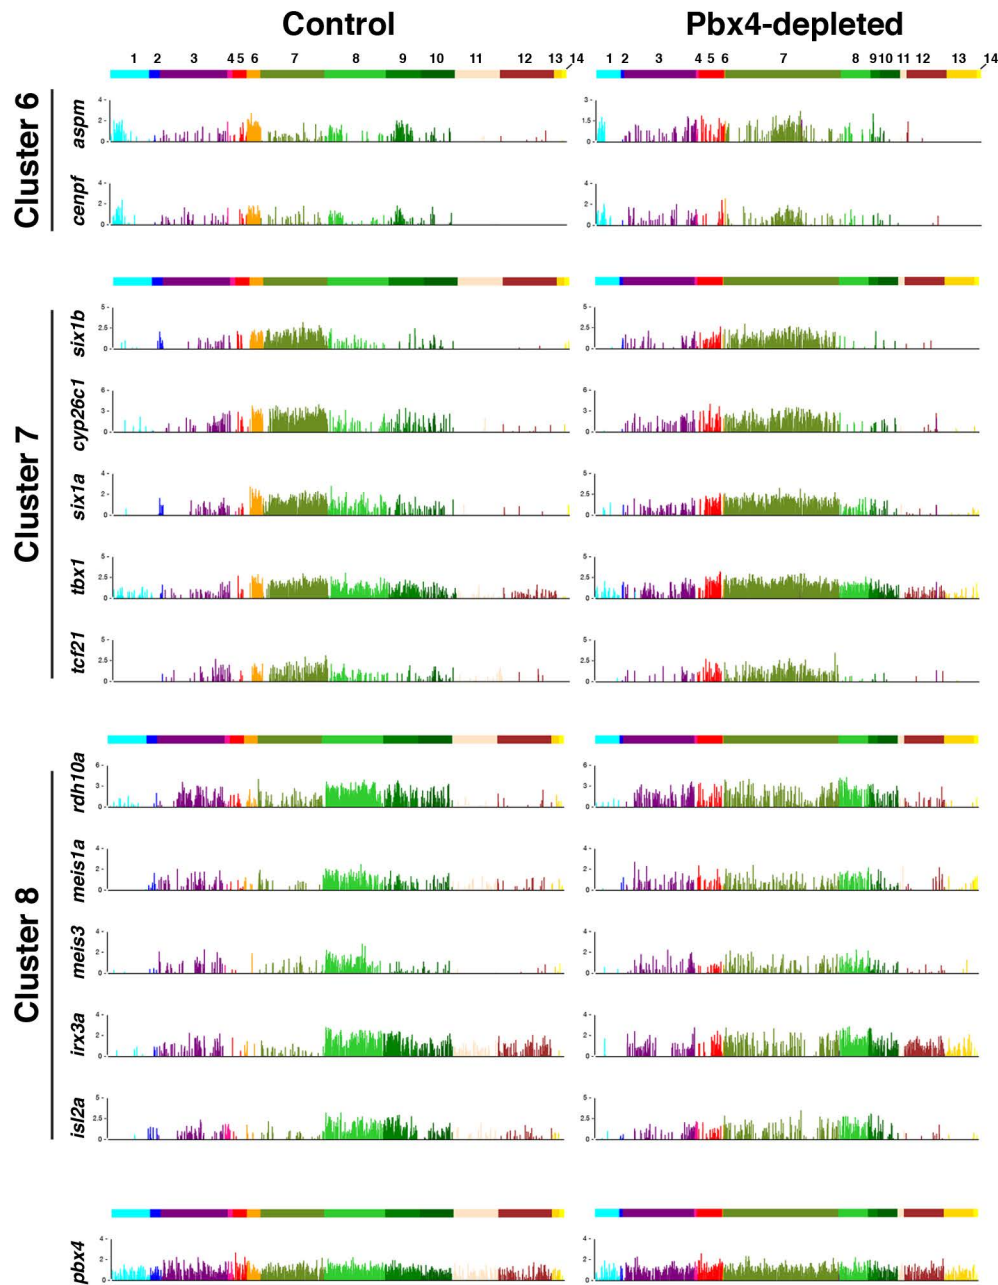

**Fig. S15. Expression of additional genes enriched in clusters 6-8 from scRNA-seq of *nkx2.5:ZsYellow+* cells.** Graphs were generated using the online Pbx4-depleted expression viewer.

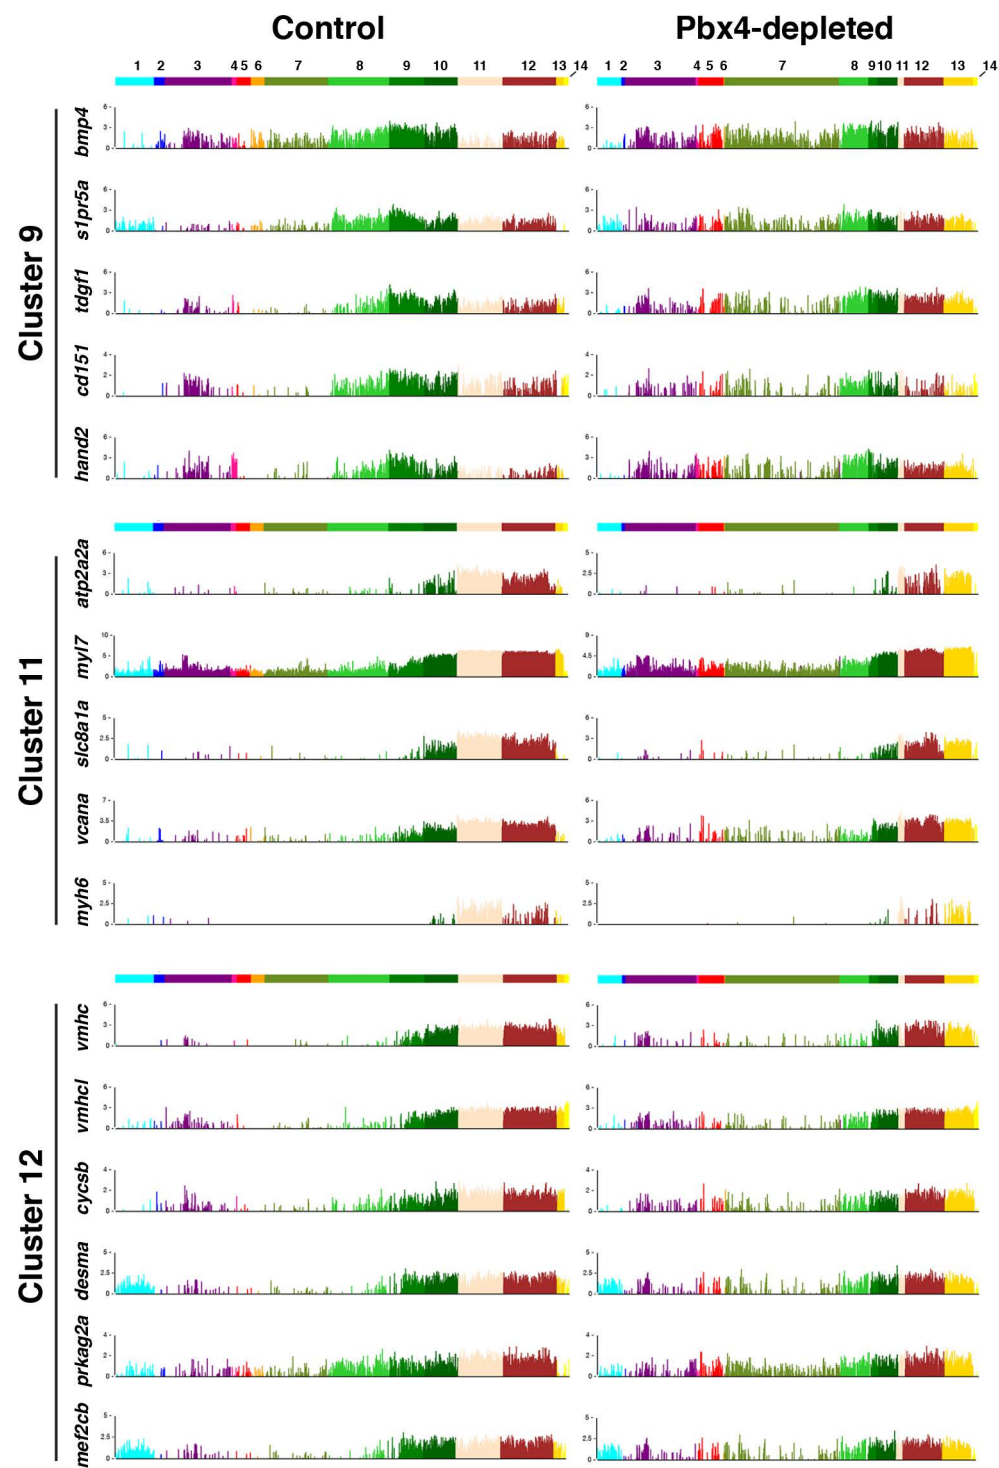

**Fig. S16. Expression of additional genes enriched in clusters 9, 11, and 12 in *nkx2.5:ZsYellow+* cells. Graphs using the online Pbx4-depleted expression viewer.**

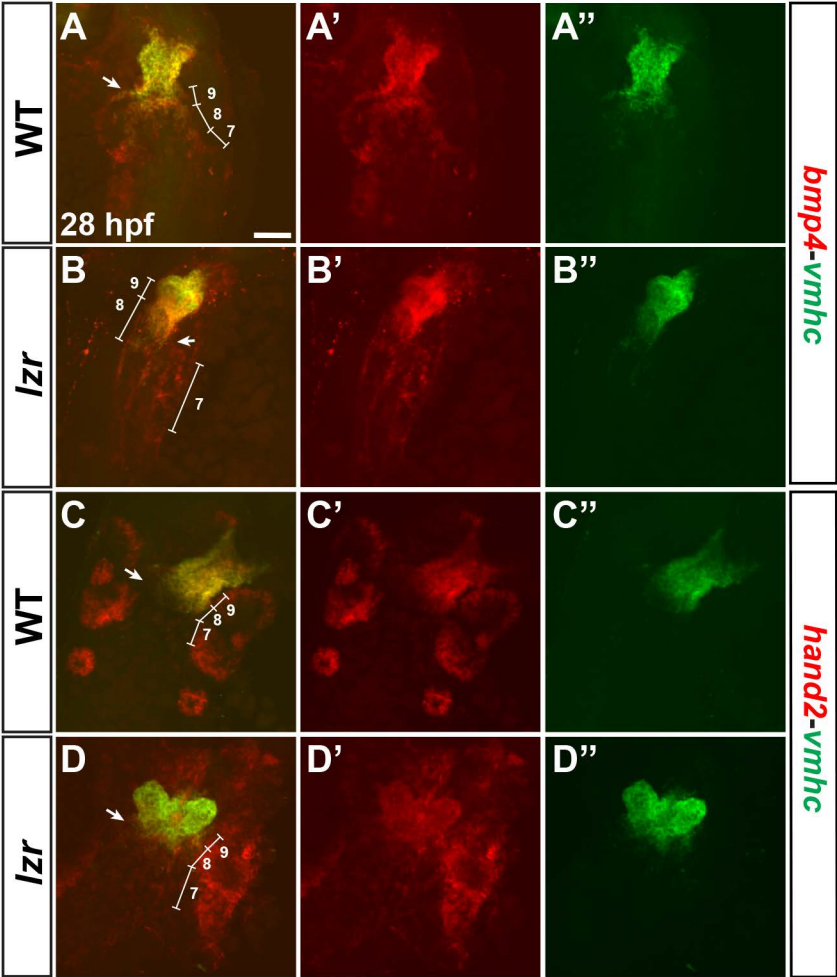

**Fig. S17. *Bmp4* and *hand2* expression domains are expanded in *lzt* mutants.** (A-D) FISH for *bmp4* and *hand2* with *vmhc* in WT and *lzt* mutant embryos at 28 hpf. Views are dorsal. Arrows indicate arterial pole of the hearts. Brackets and numbers indicate the predicted cluster populations from the scRNA-seq analysis. Scale bar - 50  $\mu$ m.



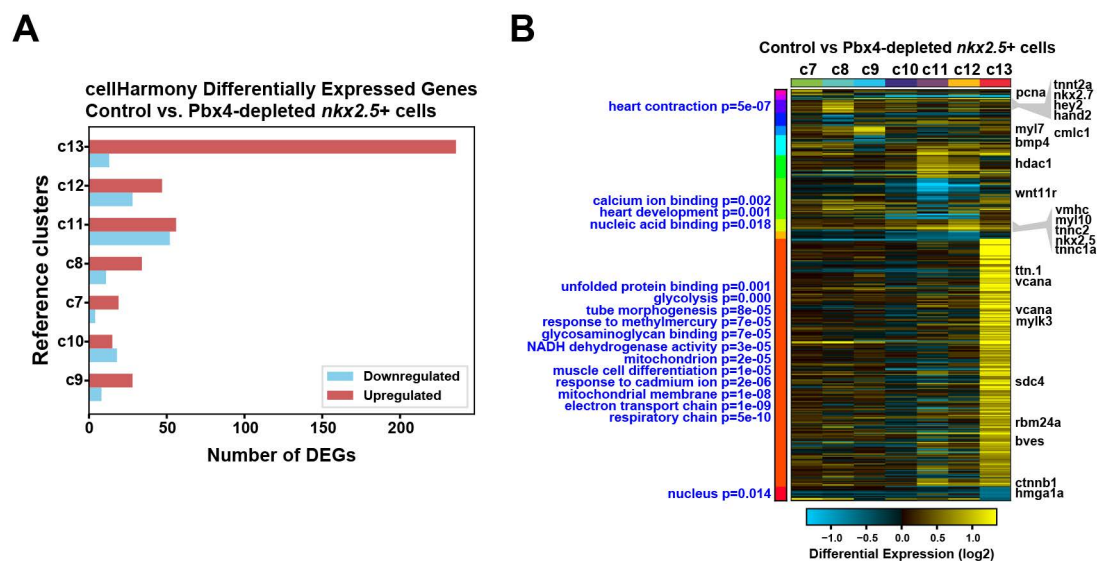

**Fig. S18. Pairwise comparison of gene expression within cardiac clusters (C7-13) from control and Pbx4-depleted *nkx2.5:ZsYellow+* cells.** (A) Number of differentially expressed genes in each cluster. (B) Heat-map of pairwise comparison from cellHarmony showing enriched biological pathways and associated differentially expressed genes.



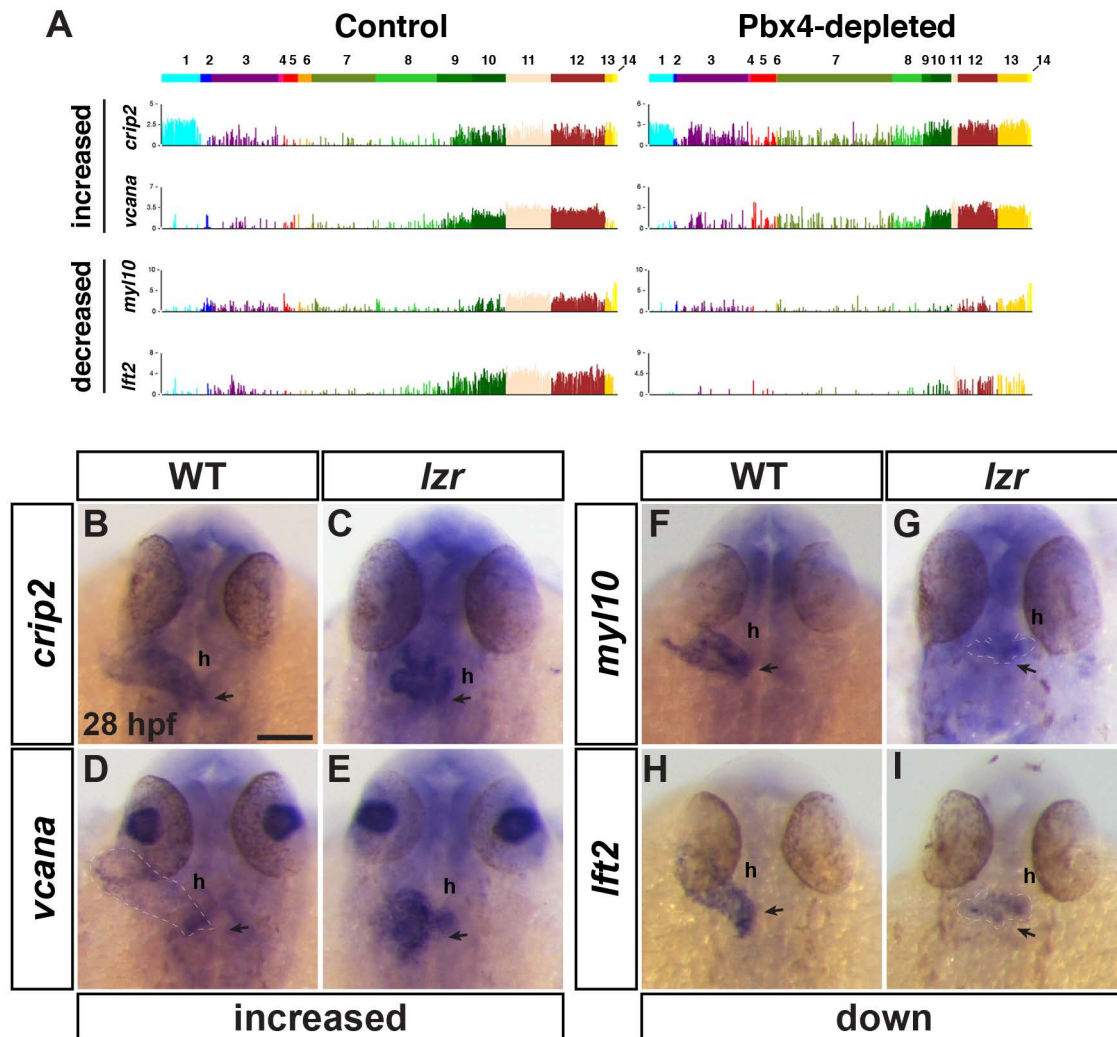

**Fig. S19. Differentially expressed genes within the hearts of *lzt* mutants.** (A) Expression of *crip2*, *vcana*, *myl10*, and *lft2* in single *nkx2.5:ZsYellow+* cells from control and Pbx4-depleted embryos. (B-I) ISH for *crip2*, *vcana*, *myl10*, and *lft2* in WT and *lzt* mutant embryos. Dashed lines outline the heart tube (h). Images are dorsal views with anterior up. Arrows indicate arterial pole of the hearts. Scale bar - 100  $\mu$ m.

**Table S1. Markers genes found to be enriched in each of the cell clusters.**[Click here to Download Table S1](#)**Table S2. Genes found that were differentially expressed in cardiac clusters between control and Pbx4-depleted cells.**[Click here to Download Table S2](#)**Table S3. Primers used in experiments.**

| gene           | genotyping primer | sequence 5' - 3'               |
|----------------|-------------------|--------------------------------|
| <i>lzf</i>     | forward           | ACTCGGCGGACTCTCGCAAGC          |
| <i>lzf</i>     | reverse           | GGCTCTCGTCGGTGATGGCCATGATCTTCT |
|                |                   |                                |
| gene           | qPCR primer       | sequence 5' - 3'               |
| <i>myh6</i>    | forward           | GCAGGTAGCGATGAAAGGAG           |
| <i>myh6</i>    | reverse           | CCTCGTCCGTCTGATAGGTC           |
|                |                   |                                |
| $\beta$ -actin | forward           | TACAGCTTCACCACCACAGC           |
| $\beta$ -actin | reverse           | AGGAAGGAAGGCTGGAAGAG           |
|                |                   |                                |
| <i>cdkn1a</i>  | forward           | GGAGAAAACCCCAGAGAAGAGC         |
| <i>cdkn1a</i>  | reverse           | AACGCTGCTACGAGAAGACGAATGC      |
|                |                   |                                |
| <i>cdkn2c</i>  | forward           | TGCGATTGGGGATCTGATGG           |
| <i>cdkn2c</i>  | reverse           | AGGTTGCCGTCTGTTGTCTAG          |
|                |                   |                                |
| <i>Itbp3</i>   | forward           | CGCCCAAACAGGCTTGTAGTAGT        |
| <i>Itbp3</i>   | reverse           | CACTCTTCGGTGAAAACGG            |
|                |                   |                                |
| <i>mef2cb</i>  | forward           | CTATGGAAACCACCGCAACT           |
| <i>mef2cb</i>  | reverse           | TGCGCAGACTGAGAGTTGTT           |
|                |                   |                                |
| <i>nkx2.5</i>  | forward           | GCATCAGAGCTTGGTGAACA           |
| <i>nkx2.5</i>  | reverse           | ATGCGCACGCATAAACATTA           |
|                |                   |                                |
| <i>vmhc</i>    | forward           | AGTCAACACCCTCACCAAGG           |
| <i>vmhc</i>    | reverse           | TGCTGCTTGTCATTTTCCAG           |
|                |                   |                                |

**Table S4. Antibodies used in experiments.**

|                  | <b>Antibody</b>                             | <b>Supplier</b>                   | <b>Product</b> | <b>Dilution</b> | <b>Procedure</b> |
|------------------|---------------------------------------------|-----------------------------------|----------------|-----------------|------------------|
| <b>Primary</b>   | Rabbit anti-DsRed                           | Clontech                          | 632496         | 1:1,000         | IHC              |
|                  | Mouse anti-Myh6                             | University of Iowa Hybridoma Bank | S46            | 1:10            | IHC              |
|                  | Chicken anti-GFP                            | Abcam                             | ab13970        | 1:250           | IHC              |
|                  | Rabbit anti-Nkx2.5                          | Gene Tex                          | 128357         | 1:250           | IHC              |
|                  | Mouse anti-Sarcomeric myosin (MHC)          | University of Iowa Hybridoma Bank | MF20           | 1:10            | IHC              |
|                  | Mouse anti-phospho Histone H3 (S10)         | Abcam                             | ab14955        | 1:1000          | IHC              |
|                  | Sheep anti-Fluorescein-POD                  | Sigma-Aldrich                     | 11426346910    | 1:50            | FISH             |
|                  | Sheep anti-DIG-POD                          | Sigma-Aldrich                     | 11207733910    | 1:50            | FISH             |
|                  | Mouse anti-TRITC (rhodamine)-POD            | Lifespan Biosciences              | LS-C147273     | 1:500           | FISH             |
|                  | Rabbit anti-Elastin b                       | YenZym                            | N/A            | 1:100           | IHC              |
|                  | Chicken anti-GFP                            | Life Technologies                 | A10262         | 1:250           | IHC              |
|                  |                                             |                                   |                |                 |                  |
| <b>Secondary</b> | Goat anti-rabbit IgG (H & L) TRITC          | Southern Biotech                  | 4050-03        | 1:100           | IHC              |
|                  | Goat anti-mouse IgG1 FITC                   | Southern Biotech                  | 1070-02        | 1:100           | IHC              |
|                  | Goat anti-Chicken IgG FITC                  | Southern Biotech                  | 6100-02        | 1:100           | IHC              |
|                  | Goat anti-Rabbit IgG(H+L) Alexa Fluor 488   | Southern Biotech                  | 4050-03        | 1:100           | IHC              |
|                  | Goat anti-mouse IgG2b TRITC                 | Southern Biotech                  | 109003         | 1:100           | IHC              |
|                  | Goat anti chicken IgY(H+L) Alexa Fluor 488  | Southern Biotech                  | 6100-30        | 1:100           | IHC              |
|                  | Goat anti-mouse IgG (H & L) Alexa Fluor 405 | Life Technologies                 | A31553         | 1:100           | IHC              |
|                  | Goat anti-mouse IgG1-DyLight 405            | BioLegend                         | 409109         | 1:100           | IHC              |
|                  |                                             |                                   |                |                 |                  |
